# Supplementary material for: The link between chronic periodontitis and COPD: a common role for the neutrophil?
Source: Springer Nature journal article supplement (doi:10.1186/1741-7015-11-241), 2013-11-13

## Proteases

Neutrophil Elastase  
Proteinase 3  
Cathepsin G  
Cathepsin B  
MMPs

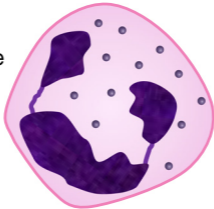

## Anti-Proteases

AAT  
SLPI  
Cystatin C  
TIMPs 1-4  
SERPINA3

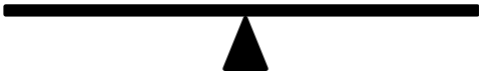

Supplement: 12916_2013_865_MOESM2_ESM.pdf [file 12916_2013_865_MOESM2_ESM.pdf]
