# Supplementary material for: The link between chronic periodontitis and COPD: a common role for the neutrophil?
Source: Springer Nature journal article supplement (doi:10.1186/1741-7015-11-241), 2013-11-13
Supplement: 12916_2013_865_MOESM3_ESM.pdf [file 12916_2013_865_MOESM3_ESM.pdf]

NADPH-oxidase,  
glycolysis,

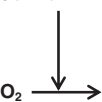

SOD

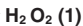

Via MPO and  
halides

Hypohalous acids such as  
**HOCl (2)**

Fenton Reaction

**OH<sup>-</sup> and OH<sup>•</sup> (3)**

Reaction with  
NO

**ONOO<sup>-</sup> (4)**
