# Supplementary material for: The link between chronic periodontitis and COPD: a common role for the neutrophil?
Source: Springer Nature journal article supplement (doi:10.1186/1741-7015-11-241), 2013-11-13

1.

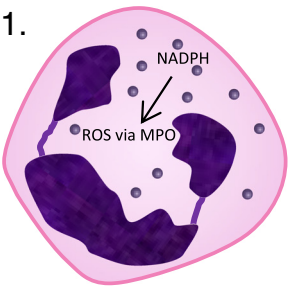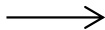

2.

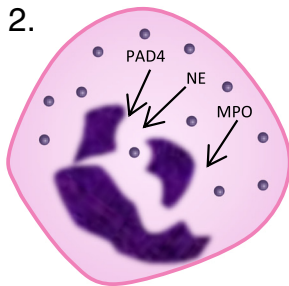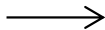

3.

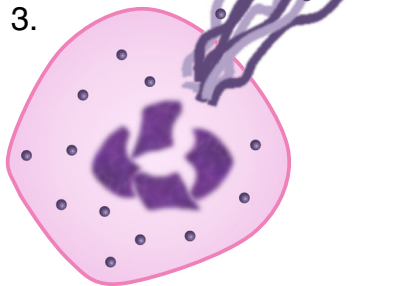

Supplement: 12916_2013_865_MOESM4_ESM.pdf [file 12916_2013_865_MOESM4_ESM.pdf]
